# Supplementary material for: Dietary protein-induced hepatic IGF-1 secretion mediated by PPARγ activation
Source: PubMed Central journal article supplement (PMC5336265; doi:10.1371/journal.pone.0173174), 2017-03-03

## S1 Fig. Western Blots

Fig 4

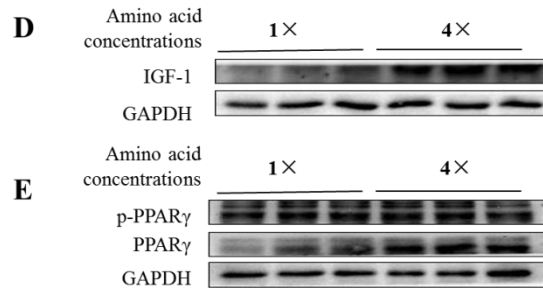

Fig 5

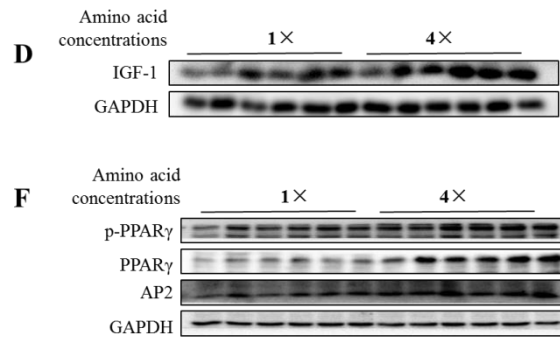

Fig 7

**A**

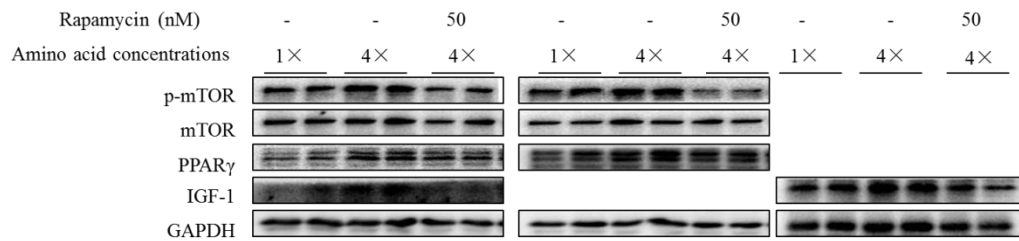

**E**

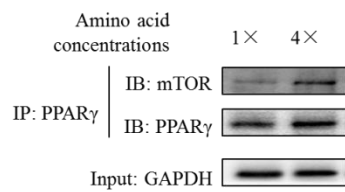

Supplement: pone.0173174.s001.pdf [file pone.0173174.s001.pdf]
