# Supplementary material for: Dietary protein-induced hepatic IGF-1 secretion mediated by PPARγ activation
Source: PubMed Central journal article supplement (PMC5336265; doi:10.1371/journal.pone.0173174), 2017-03-03
Supplement: pone.0173174.s002.pdf [file pone.0173174.s002.pdf]

**S1 Table. Composition of experimental diets for barrows**

| Item                                             | Dietary crude protein concentration, % |       |
|--------------------------------------------------|----------------------------------------|-------|
|                                                  | 14                                     | 20    |
| Ingredients, %                                   |                                        |       |
| *Digestible energy (MJ/kg)                       | 14.60                                  | 14.60 |
| Crude protein                                    | 14.14                                  | 20.27 |
| Lysine                                           | 1.26                                   | 1.26  |
| Methionine and cysteine                          | 0.63                                   | 0.62  |
| Threonine                                        | 0.76                                   | 0.76  |
| Tryptophan                                       | 0.20                                   | 0.20  |
| Arginine                                         | 0.71                                   | 1.09  |
| Histidine                                        | 0.30                                   | 0.44  |
| Isoleucine                                       | 0.46                                   | 0.71  |
| Leucine                                          | 1.11                                   | 1.52  |
| Phenylalanine                                    | 0.56                                   | 0.81  |
| Valine                                           | 0.54                                   | 0.72  |
| Calcium                                          | 0.70                                   | 0.69  |
| Phosphorus                                       | 0.53                                   | 0.57  |
| Essential amino acids                            | 6.29                                   | 7.91  |
| Non-essential amino acids                        | 6.84                                   | 9.74  |
| Essential amino acids /non-essential amino acids | 0.90                                   | 0.80  |
